# Supplementary material for: Odd–even effect in a thiazole based organogelator: understanding the interplay of non-covalent interactions on property and applications
Source: Royal Society of Chemistry journal article supplement (doi:10.1039/c4nj01247j), 2014-11-04
Supplement: c4nj01247j1.pdf [file c4nj01247j1.pdf]

## Supporting Information

### **Odd-Even effect in a thiazole based organogelator : Understanding the interplay of non-covalent interactions on property and applications**

Priyanka Yadav<sup>a</sup> and Amar Ballabh<sup>a\*</sup>

**Table-S1: Gelation studies of compounds 1e-1h, 2e-2h and 3e-3h**

| Solvents     | 1e          | 1f          | 1g          | 1h          | 2e | 2f | 2g | 2h | 3e          | 3f          | 3g          | 3h          |
|--------------|-------------|-------------|-------------|-------------|----|----|----|----|-------------|-------------|-------------|-------------|
| Methanol     | W.G         | G<br>(1.46) | C           | G<br>(2.60) | S  | S  | S  | S  | G<br>(0.68) | G<br>(0.48) | G<br>(0.73) | G<br>(0.70) |
| Ethanol      | W.G         | G<br>(1.49) | C           | G<br>(4.06) | S  | S  | S  | S  | G<br>(1.05) | G<br>(0.66) | G<br>(0.88) | G<br>(0.70) |
| n-pentanol   | S           | G<br>(2.73) | S           | G<br>(7.46) | S  | S  | S  | S  | G<br>(2.96) | G<br>(2.33) | G<br>(2.94) | G<br>(0.32) |
| n-heptanol   | S           | G<br>(3.31) | S           | G<br>(9.90) | S  | S  | S  | S  | G<br>(3.14) | G<br>(3.19) | G<br>(4.23) | G<br>(0.39) |
| Water        | P           | P           | P           | P           | P  | P  | P  | P  | P           | P           | P           | P           |
| THF          | S           | S           | S           | S           | S  | S  | S  | S  | S           | S           | S           | S           |
| Iso octane   | P           | P           | P           | P           | P  | P  | P  | P  | G<br>(1.50) | G<br>(1.05) | P           | P           |
| Xylene       | C           | P           | C           | S           | P  | P  | P  | P  | P           | P           | S           | S           |
| Cyclohexane  | P           | P           | P           | P           | P  | P  | P  | P  | P           | G<br>(2.56) | P           | P           |
| n-octadecane | G<br>(1.47) | G<br>(0.69) | G<br>(0.90) | G<br>(1.10) | S  | S  | S  | S  | G<br>(1.42) | G<br>(1.30) | G<br>(2.29) | G<br>(2.42) |

\*G=Gel, S=solution, C=crystals, W.G.= weak gel, P= Precipitate (value in parenthesis stand for cgc in wt%)

**Table-S2: Gelation studies of compounds 1a-1d, 2a-2d and 3a-3d\*\***

| Solvents     | 1a | 1b  | 1c          | 1d          | 2a | 2b | 2c | 2d | 3a | 3b          | 3c          | 3d          |
|--------------|----|-----|-------------|-------------|----|----|----|----|----|-------------|-------------|-------------|
| Methanol     | S  | C   | C           | G<br>(1.86) | S  | S  | S  | S  | S  | G<br>(2.57) | G<br>(2.11) | G<br>(0.65) |
| Ethanol      | S  | S   | C           | G<br>(2.16) | S  | S  | S  | S  | S  | G<br>(2.82) | G<br>(2.17) | G<br>(0.80) |
| n-pentanol   | S  | S   | S           | G<br>(2.80) | S  | S  | S  | S  | S  | G<br>(4.44) | G<br>(4.20) | G<br>(2.12) |
| n-heptanol   | S  | S   | S           | S           | S  | S  | S  | S  | S  | G<br>(4.76) | G<br>(4.92) | G<br>(3.83) |
| Water        | P  | P   | P           | P           | P  | P  | P  | P  | P  | P           | P           | P           |
| THF          | S  | S   | S           | S           | S  | S  | S  | S  | S  | S           | S           | S           |
| Iso octane   | S  | P   | P           | G<br>(2.42) | S  | S  | S  | S  | P  | P           | P           | G<br>(0.90) |
| Xylene       | S  | S   | C           | C           | S  | S  | S  | S  | S  | S           | S           | P           |
| Cyclohexane  | P  | P   | P           | G<br>(2.40) | S  | P  | S  | P  | P  | P           | P           | G<br>(3.17) |
| n-octadecane | P  | W.G | G<br>(1.00) | G<br>(0.70) | S  | P  | S  | P  | P  | G<br>(2.21) | G<br>(2.37) | G<br>(1.16) |

\*G=Gel, S=solution, W.G.= weak gel, P= Precipitate (value in parenthesis stand for cgc in wt%)

# P. Yadav, D. Kaur, V. K. Gupta, Rajnikant and A. Ballabh, *RSC Adv.*, 2013, **3**, 8417-8421.

**Table S3: Crystallographic information table**

| <b>Crystal data</b>                         | <b>1c</b>                                         | <b>1d</b>                                         | <b>2d</b>                                         | <b>3c</b>                                         |
|---------------------------------------------|---------------------------------------------------|---------------------------------------------------|---------------------------------------------------|---------------------------------------------------|
| CCDC No.                                    | 958233                                            | 966725                                            | 957407                                            | 965887                                            |
| Source                                      | Mo K $\alpha$                                     | Cu K $\alpha$                                     | Cu K $\alpha$                                     | Cu K $\alpha$                                     |
| Wavelength (Å)                              | 0.7107                                            | 1.5418                                            | 1.5418                                            | 1.5418                                            |
| Empirical formula                           | C <sub>16</sub> H <sub>28</sub> N <sub>2</sub> OS | C <sub>17</sub> H <sub>30</sub> N <sub>2</sub> OS | C <sub>18</sub> H <sub>32</sub> N <sub>2</sub> OS | C <sub>17</sub> H <sub>30</sub> N <sub>2</sub> OS |
| Formula weight                              | 296.46                                            | 310.49                                            | 324.52                                            | 310.49                                            |
| Crystal size (mm)                           | 0.9x 0.15 x 0.15                                  | 0.18x 0.12 x 0.02                                 | 1.0 x 0.8 x 0.56                                  | 0.54x 0.45 x 0.15                                 |
| Crystal system                              | Monoclinic                                        | Monoclinic                                        | Monoclinic                                        | Triclinic                                         |
| Space group                                 | P 2 <sub>1</sub> /c                               | P 2 <sub>1</sub> /c                               | P 2 <sub>1</sub> /c                               | P-1                                               |
| a/Å                                         | 20.6963(8)                                        | 23.237(2)                                         | 22.1166(3)                                        | 4.9139(3)                                         |
| b/Å                                         | 4.89894(19)                                       | 4.9497(3)                                         | 19.4545(2)                                        | 8.2041(5)                                         |
| c/Å                                         | 16.9658(7)                                        | 15.6429(12)                                       | 9.42062(13)                                       | 23.1603(10)                                       |
| $\alpha$ /°                                 | 90                                                | 90                                                | 90                                                | 84.043(4)                                         |
| $\beta$ /°                                  | 97.371(4)                                         | 90.966(8)                                         | 101.1861(13)                                      | 87.033(4)                                         |
| $\gamma$ /°                                 | 90                                                | 90                                                | 90                                                | 78.743(5)                                         |
| Volume/ Å <sup>3</sup>                      | 1705.95(12)                                       | 1798.9(2)                                         | 3976.39(9)                                        | 910.32(9)                                         |
| Z                                           | 4                                                 | 4                                                 | 8                                                 | 2                                                 |
| D <sub>calc</sub>                           | 1.154                                             | 1.146                                             | 1.084                                             | 1.1327                                            |
| F(000)                                      | 648                                               | 680                                               | 1424                                              | 340                                               |
| $\mu$ (mm <sup>-1</sup> )                   | 0.189                                             | 1.594                                             | 1.460                                             | 1.575                                             |
| Temperature (K)                             | 298                                               | 298                                               | 298                                               | 293                                               |
| Observed reflection<br>[ $I > 2\sigma(I)$ ] | 3034                                              | 1663                                              | 6244                                              | 2887                                              |
| Parameters refined                          | 186                                               | 195                                               | 409                                               | 196                                               |
| Goodness of fit                             | 1.067                                             | 1.135                                             | 1.032                                             | 1.044                                             |
| Final R <sub>1</sub> on observed<br>data    | 0.0455                                            | 0.1155                                            | 0.0493                                            | 0.0549                                            |
| Final wR <sub>2</sub> on observed<br>data   | 0.1231                                            | 0.2385                                            | 0.1351                                            | 0.1482                                            |

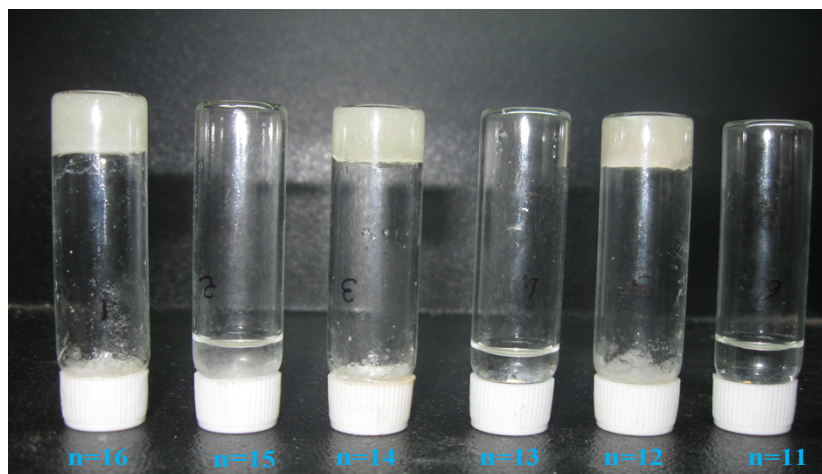

**Fig. S1: Odd-even effect of compounds 1c-1h in methanol (n=number of methylene group in alkyl chain)**

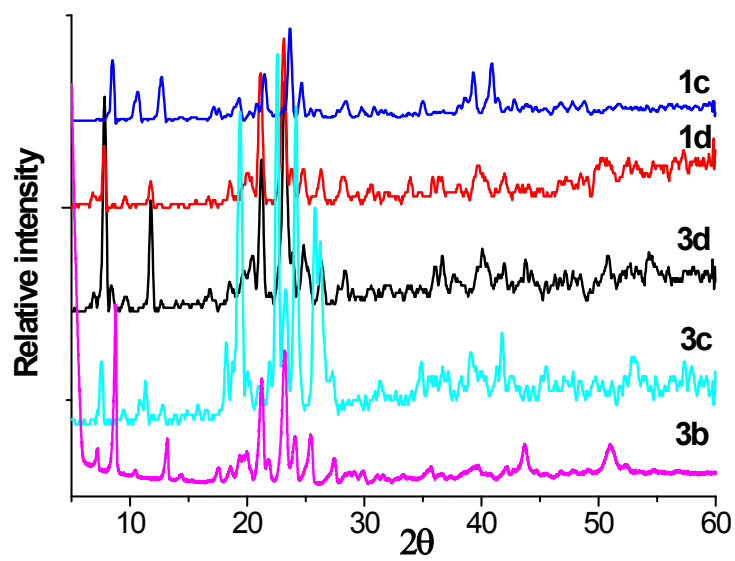

**Fig. S2: PXRD pattern of 1c-1d and 3b-3d**

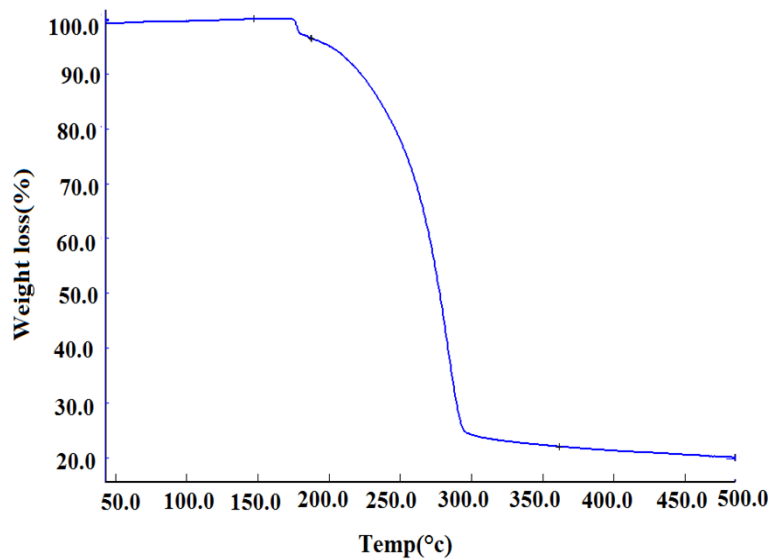

**Fig. S3: TGA curves for the ZnO nanoparticles embedded in gelator**

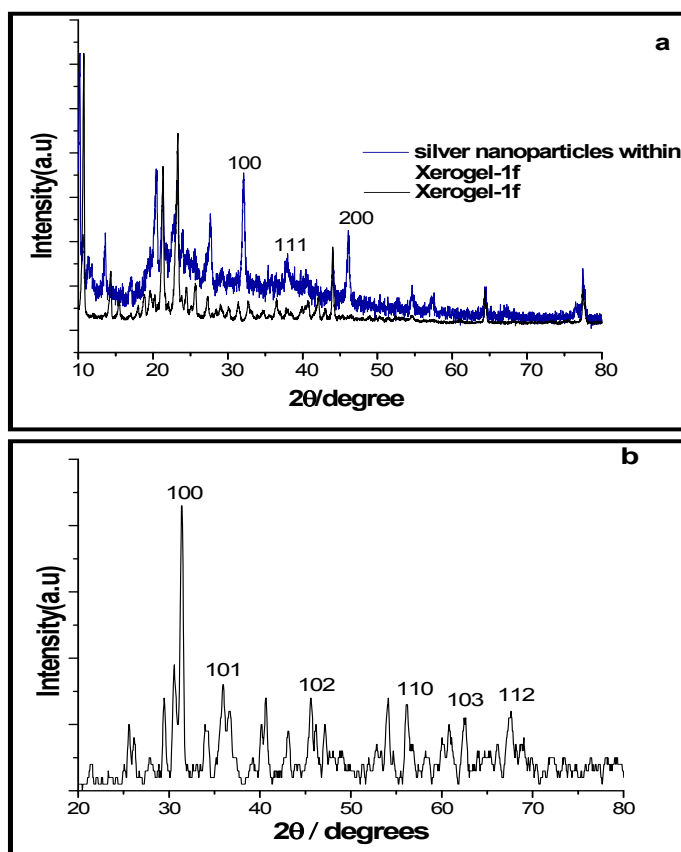

**Fig. S4: XRD pattern of (a) silver nanoparticles (b) ZnO nanoparticles**
